# Supplementary material for: Sequence of a Complete Chicken BG Haplotype Shows Dynamic Expansion and Contraction of Two Gene Lineages with Particular Expression Patterns
Source: PubMed Central journal article supplement (PMC4046983; doi:10.1371/journal.pgen.1004417), 2014-06-05

**A**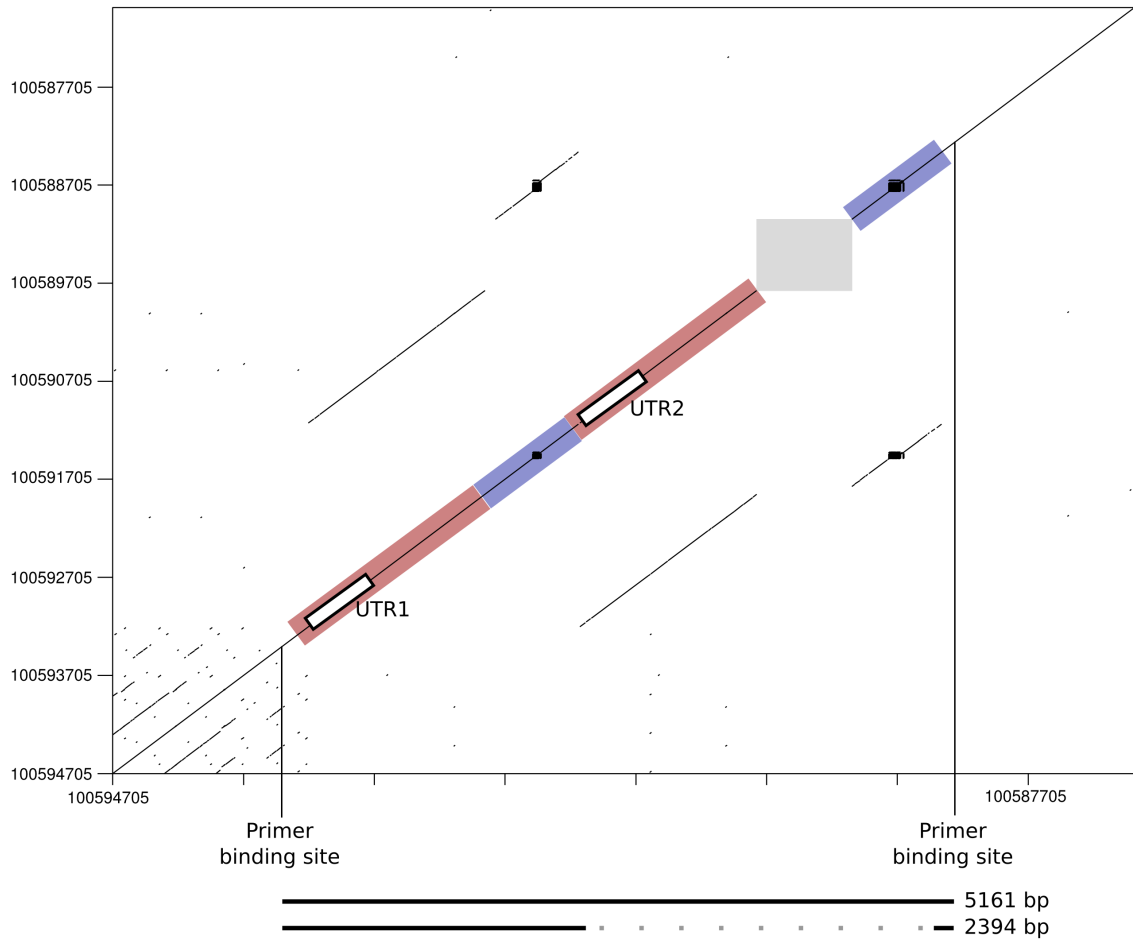**B**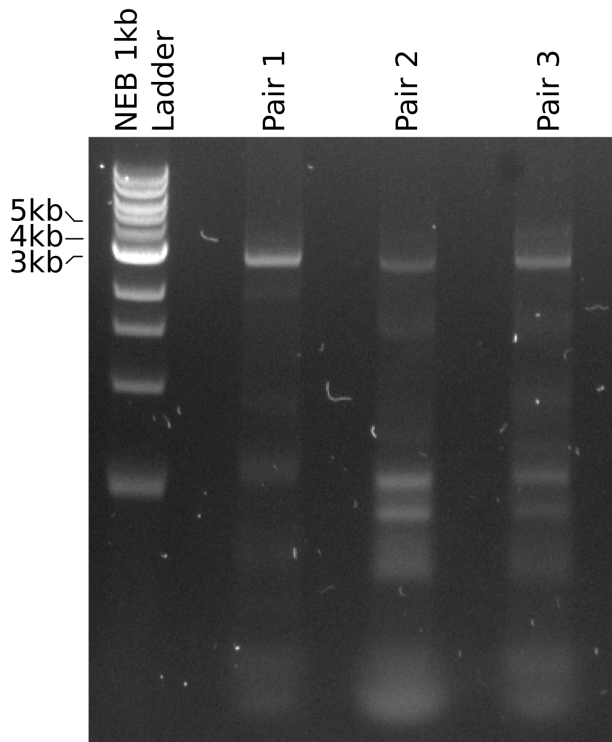

Supplement: pgen.1004417.s008.pdf [file pgen.1004417.s008.pdf]
