# Supplementary material for: Sequence of a Complete Chicken BG Haplotype Shows Dynamic Expansion and Contraction of Two Gene Lineages with Particular Expression Patterns
Source: PubMed Central journal article supplement (PMC4046983; doi:10.1371/journal.pgen.1004417), 2014-06-05

# Whole cDNA

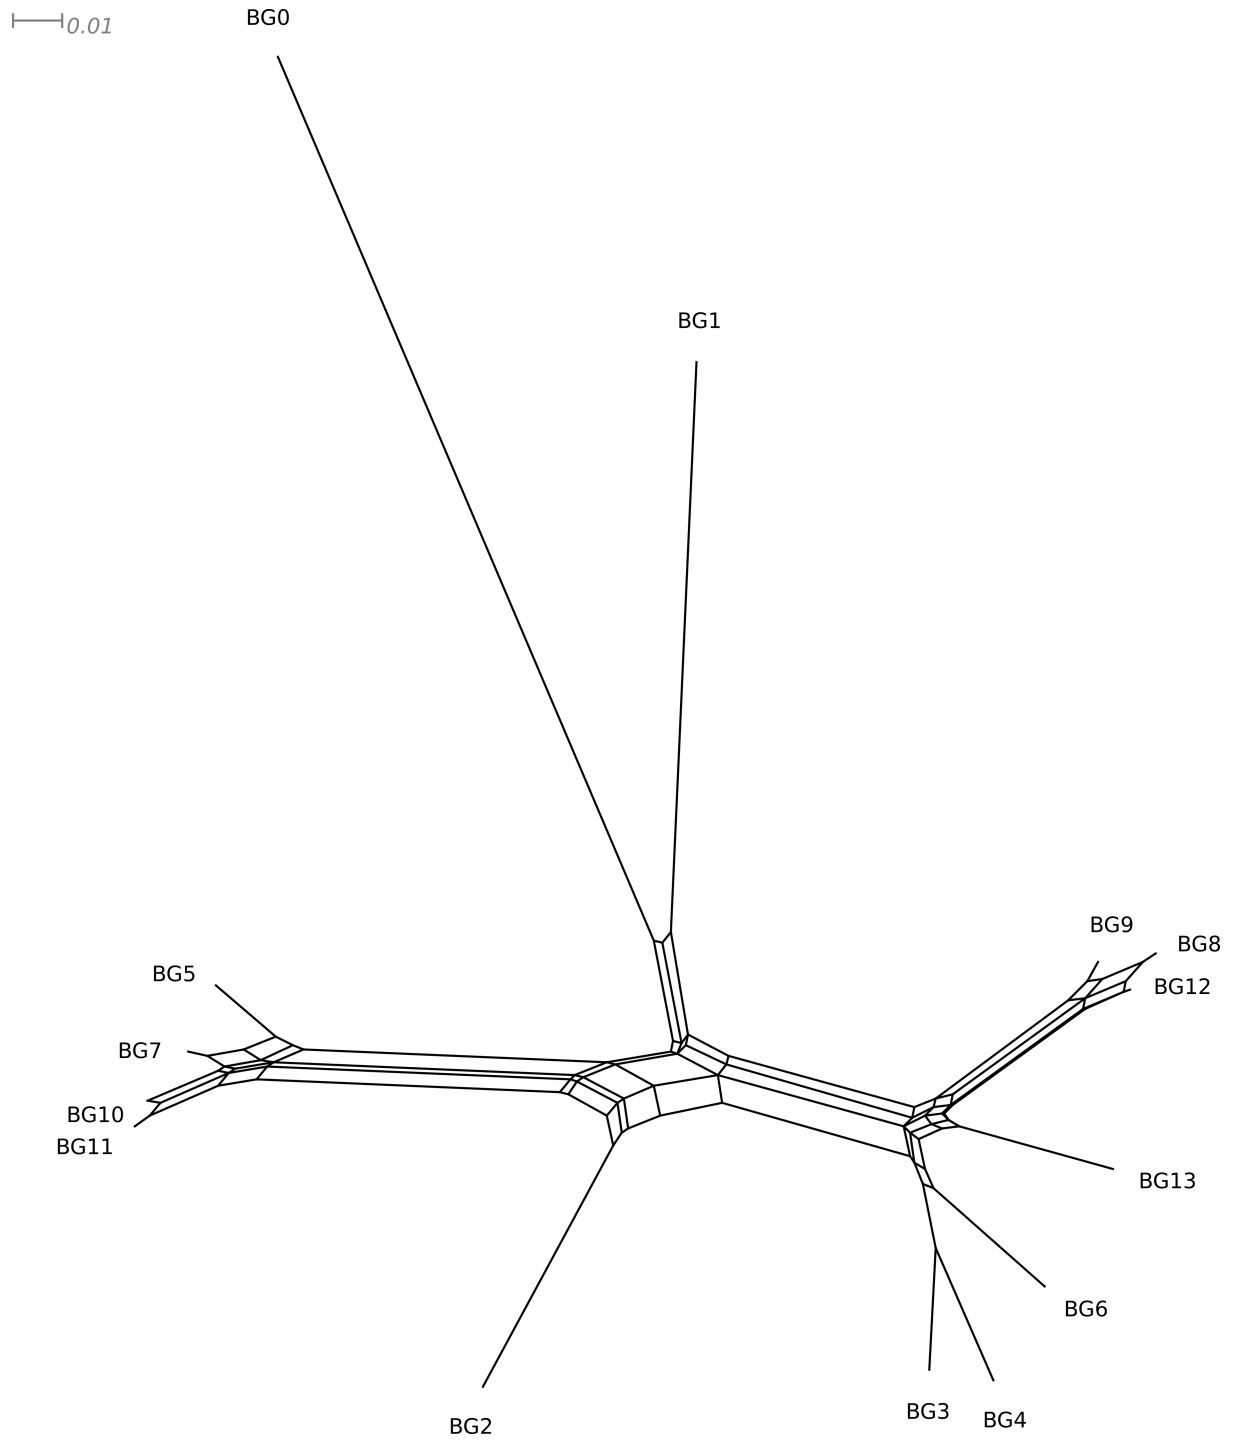

### Promoters

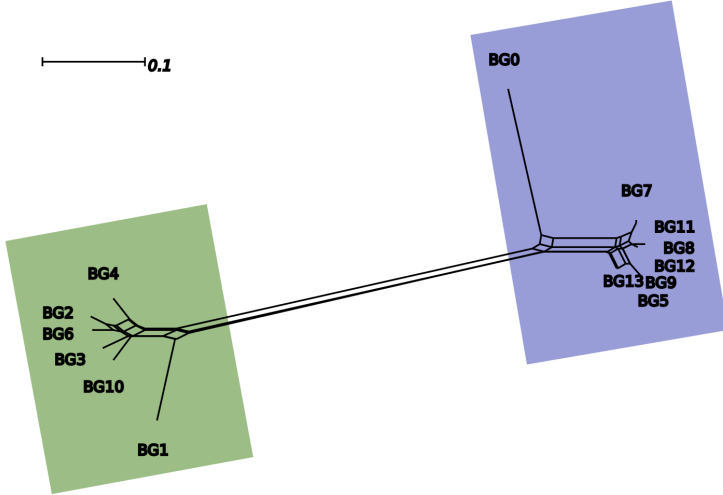

### 5' UTRs

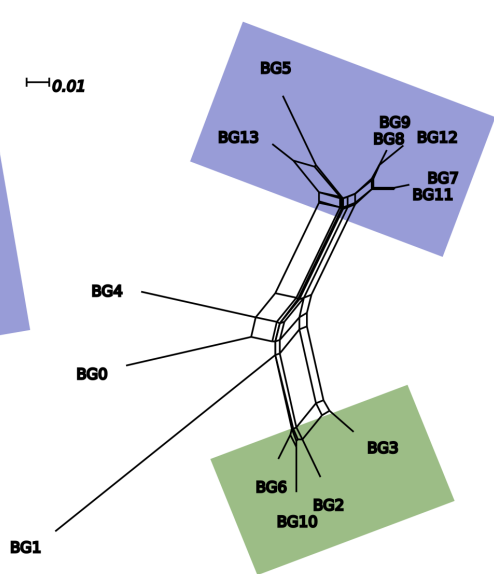

### Signal Sequences

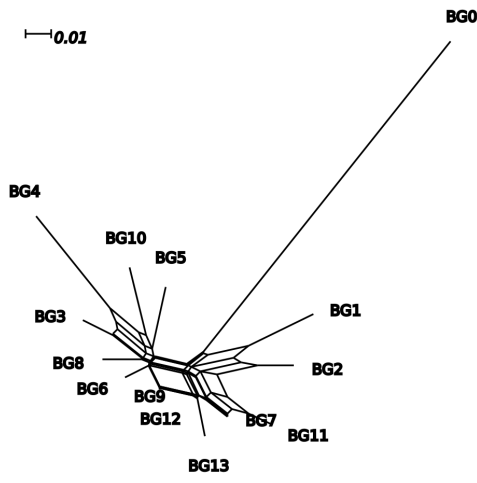

### Variable Regions

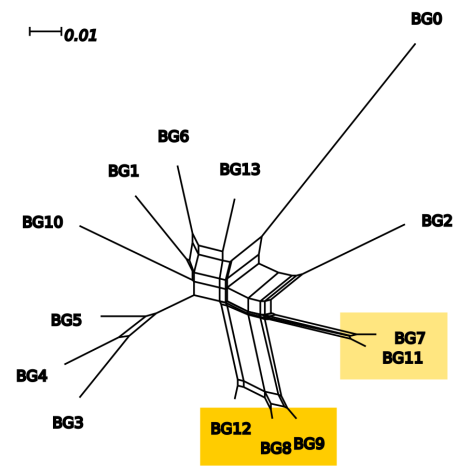

### Transmembrane Domains

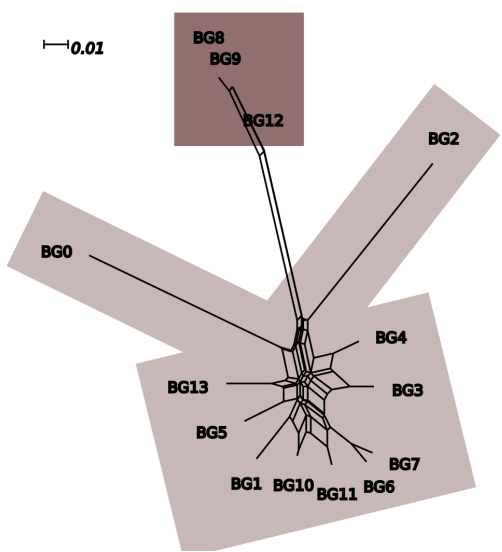

### 3' UTRs

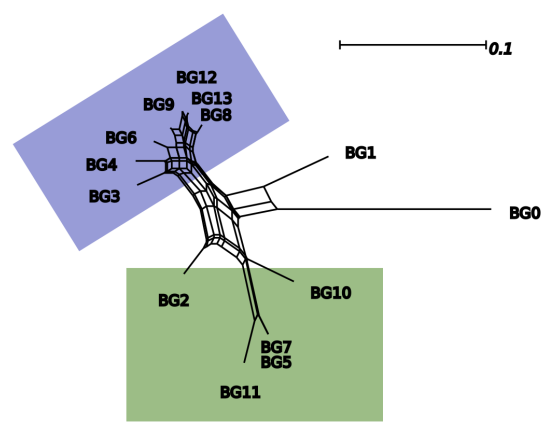

Supplement: pgen.1004417.s014.pdf [file pgen.1004417.s014.pdf]
