# Supplementary material for: Sequence of a Complete Chicken BG Haplotype Shows Dynamic Expansion and Contraction of Two Gene Lineages with Particular Expression Patterns
Source: PubMed Central journal article supplement (PMC4046983; doi:10.1371/journal.pgen.1004417), 2014-06-05

**A.**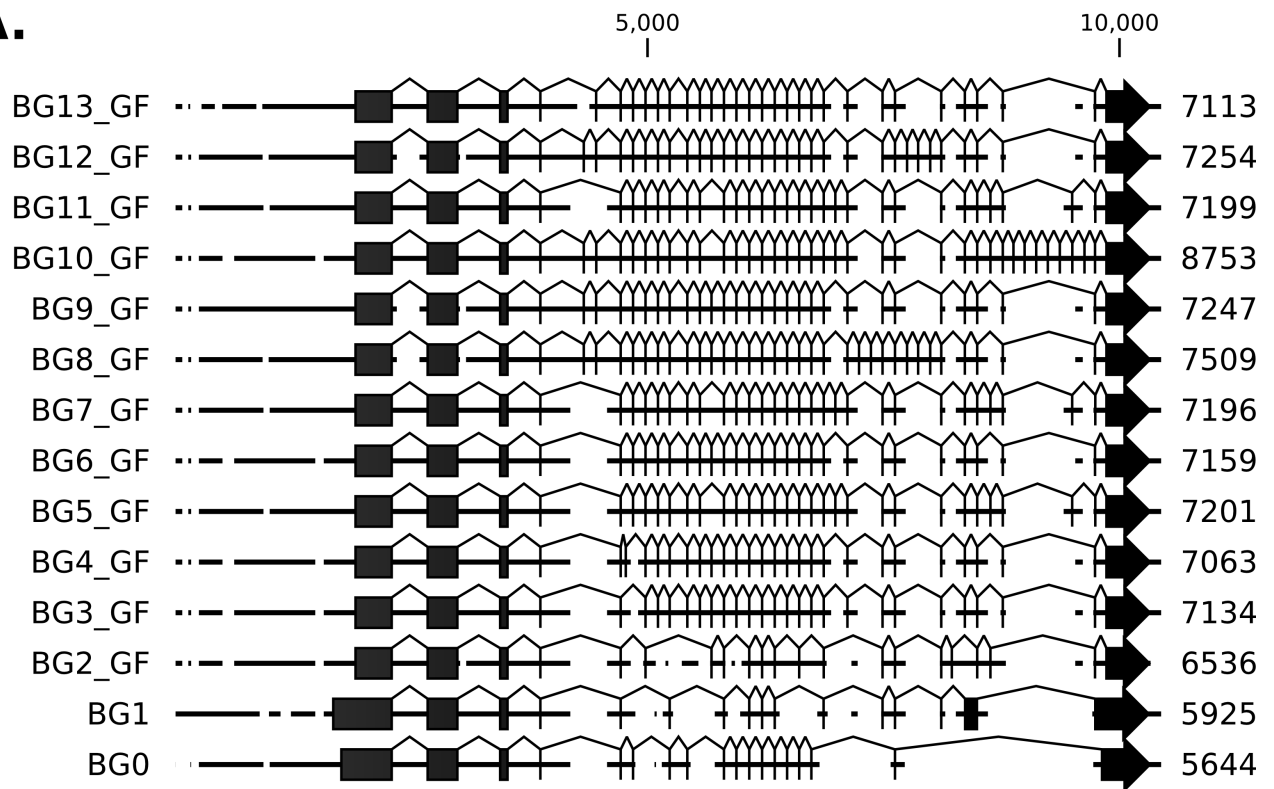**B.**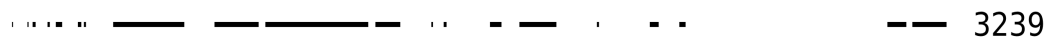**C.**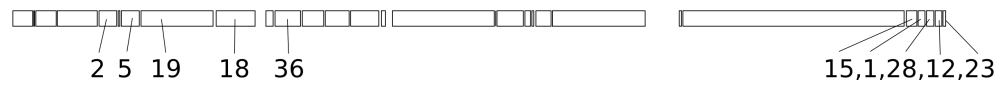

## D. Promotor

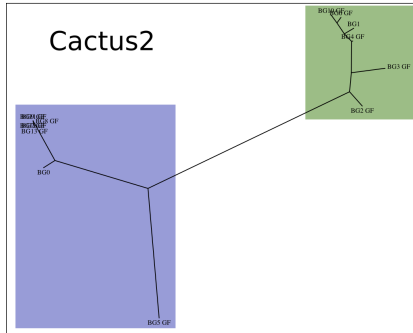

## V-region

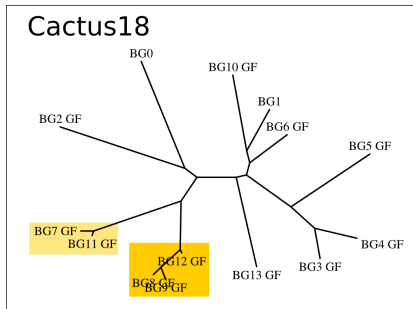

## 5' UTR

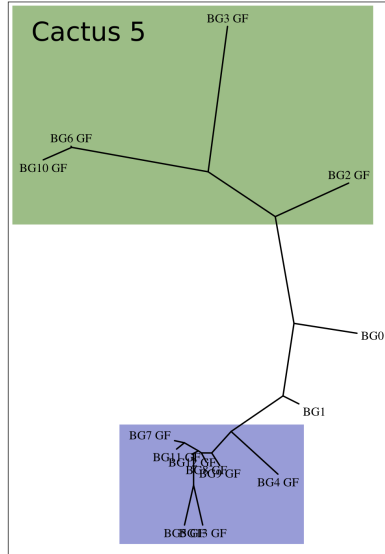

## 5'UTR + intron

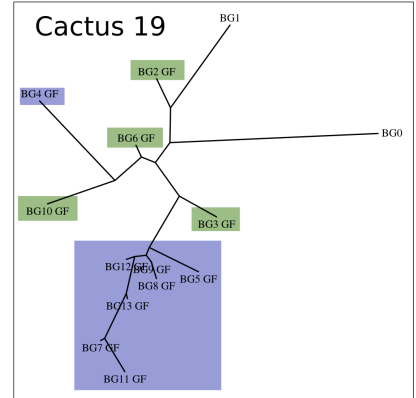

## TM-region

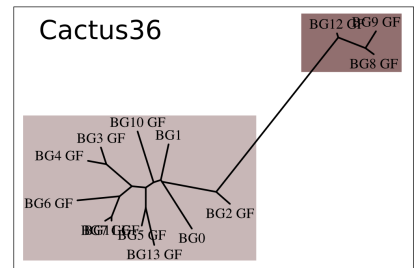

## E.

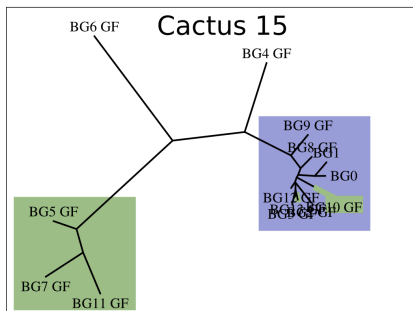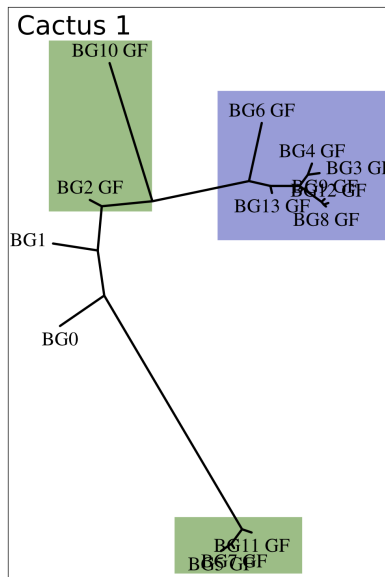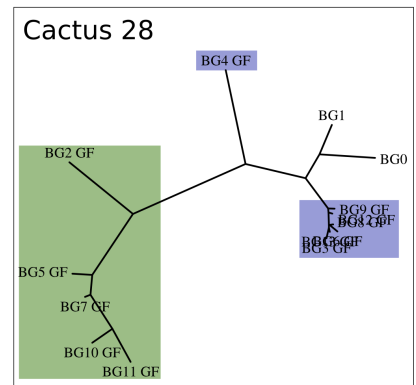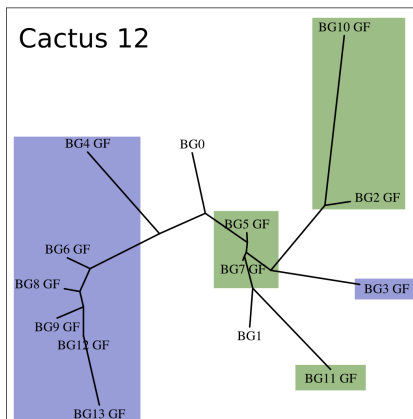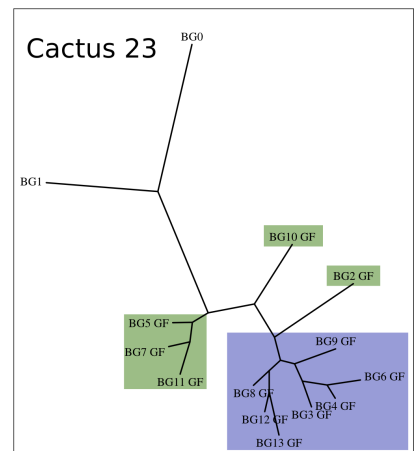

Supplement: pgen.1004417.s015.pdf [file pgen.1004417.s015.pdf]
